# Supplementary material for: Optimization of extraction of antioxidant polysaccharide from Pleurotus ostreatus (Jacq.) P. Kumm and its cytotoxic activity against murine lymphoid cancer cell line
Source: PLoS One. 2019 Jan 3;14(1):e0209371. doi: 10.1371/journal.pone.0209371 (PMC6317818; doi:10.1371/journal.pone.0209371)
Supplement: S1 Dataset — (XLSX) [file pone.0209371.s001.xlsx]

## Sheet: S1
Supporting Information S1 Dataset: Impacts of three variables for the POP extraction
	A	Water to Raw Material ratio							B	Extraction Time (Min.)							C	Extraction Temp. (oC)
		Water to raw material ratio (mL/mg)	% POP yield1	%POP yield2	%POP yield3	Mean of %POP yield	SD			Extraction Time (Min.)	%POP yield1	%POP yield2	%POP yield3	Mean of % POP yield	SD			Extraction Temp. (oC)	%POP yield1	%POP yield2	%POP yield3	Mean of %POP yield	SD
		15	3.57	3.56	3.59	3.57333	0.0152753			40	3.429	3.455	3.436	3.44	0.0134536			50	3.567	3.476	3.419	3.48733	0.0746481
		20	4.32	4.28	4.31	4.30333	0.0208167			50	4.406	4.327	4.309	4.34733	0.0515978			60	4.035	4.02	4.02	4.025	0.00866025
		25	5.2	5.21	5.23	5.21333	0.0152753			60	5.209	5.26	5.227	5.232	0.025865			70	5.422	5.214	5.209	5.28167	0.121558
		30	4.34	4.39	4.36	4.36333	0.0251661			70	4.56	4.3	4.55	4.47	0.147309			80	4.543	4.345	4.534	4.474	0.111808
		POP: Pleurotus ostreatus Polysaccharide
		SD: Standard Deviation
