# Supplementary material for: Optimization of extraction of antioxidant polysaccharide from Pleurotus ostreatus (Jacq.) P. Kumm and its cytotoxic activity against murine lymphoid cancer cell line
Source: PLoS One. 2019 Jan 3;14(1):e0209371. doi: 10.1371/journal.pone.0209371 (PMC6317818; doi:10.1371/journal.pone.0209371)
Supplement: S2 Dataset — (XLSX) [file pone.0209371.s002.xlsx]

## Sheet: Sheet1
Supporting Information S2 Dataset: Antioxidant activity of POP
																												Control	Vitamin C
	A.	DPPH	POP Conc. (mg/mL)	% DPPH radical scavenging activity 1	% DPPH radical scavenging activity 2	% DPPH radical scavenging activity 3	SD	Mean		B.	ABTS								Control	Vitamin C
			0.2	18.2	22.1	16.3	2.95691	18.8667				POP Conc. (mg/mL)	%ABTS radical scavenging 1	%ABTS radical scavenging 2	%ABTS radical scavenging 3	Mean	SD				Vitamin C Conc. (mg/mL)	%DPPH radical scavenging 1	%DPPH radical scavenging 2	%DPPH radical scavenging 3	Mean	SD			Vitamin C (mg/mL)	%ABTS radical scavenging1	%ABTS radical scavenging2	%ABTS radical scavenging3	Mean	SD
			0.4	24	28	32	4	28				0.2	20.45	27.03	21.07	22.85	3.63324				0.2	38.16	34.11	32.48	34.9167	2.92466			0.2	35.87	31.65	33.13	33.55	2.14112
			0.6	34.92	39.87	34.38	3.02584	36.39				0.4	34.21	38.62	34.08	35.6367	2.58446				0.4	39.87	39.65	43.81	41.11	2.34085			0.4	41.4	38.08	35.9	38.46	2.76962
			0.8	42.59	38.49	47	4.25594	42.6933				0.6	42.07	47.34	43.2	44.2033	2.77457				0.6	46.05	51.22	43.18	46.8167	4.07446			0.6	43.54	53.8	49.07	48.8033	5.1352
			1	52.26	55.43	49	3.2151	52.23				0.8	47.03	52.01	45.22	48.0867	3.51617				0.8	49.13	53.1	48.11	50.1133	2.63633			0.8	48.65	50.14	51.21	50	1.28573
			1.2	54.78	62.56	57.08	3.99685	58.14				1	52.07	57.01	53.11	54.0633	2.60433				1	51.06	58.15	55.04	54.75	3.55389			1	50.87	57.68	54.92	54.49	3.4253
			1.4	61.47	64.31	67.23	2.88009	64.3367				1.2	55.23	61.04	54.18	56.8167	3.695				1.2	54.11	61.56	57.73	57.8	3.72549			1.2	53.56	60.87	58.01	57.48	3.68371
			1.6	66.22	72.6	65	4.08152	67.94				1.4	60.24	65.45	61.36	62.35	2.74246				1.4	61.04	60.03	65.66	62.2433	3.00171			1.4	60.54	59.05	66.71	62.1	4.06129
			1.8	70.23	78.01	71.06	4.27239	73.1				1.6	69.58	67.01	72.56	69.7167	2.77752				1.6	64.14	62.09	67.51	64.58	2.73666			1.6	63.87	61.31	68.17	64.45	3.46658
			2	80.7	83.04	72.79	5.37132	78.8433				1.8	72.16	77.34	76.03	75.1767	2.69337				1.8	66.45	65.81	71.83	68.03	3.30642			1.8	65.88	69.2	68.94	68.0067	1.84633
			3	88.2	95.31	87.12	4.44962	90.21				2	78.05	85.22	79.12	80.7967	3.8679				2	69.08	71.33	77.78	72.73	4.51581			2	68.21	70.46	75.18	71.2833	3.55719
			4	98.28	98.75	93	3.19275	96.6767				3	85.26	91.07	84.02	86.7833	3.76378				3	76.04	81.35	78.02	78.47	2.68345			3	74.89	80.11	76.66	77.22	2.65468
			5	95.67	98.89	98.16	1.68826	97.5733				4	89.1	90.21	95.87	91.7267	3.6309				4	79.01	82.11	86.23	82.45	3.62199			4	78.44	81.26	86.51	82.07	4.09552
												5	95.66	98.29	93.01	95.6533	2.64001				5	81.62	87.06	83.59	84.09	2.75425			5	82.76	88.42	82.23	84.47	3.43105
		EC50 calculation of POP and Vitamin C : POP against DPPH radical scavenging (A), POP against ABTS radical scavenging (B), Vitamin C against DPPH radicals and Vitamin C against ABTS radicals
		A								B										C									D
